# Supplementary material for: Evaluation of Ce-doped Pr2CuO4for potential application as a cathode material for solid oxide fuel cells
Source: Royal Society of Chemistry journal article supplement (doi:10.1039/c6ra21970e), 2016-01-01
Supplement: c6ra21970e1.pdf [file c6ra21970e1.pdf]

## Supporting Information

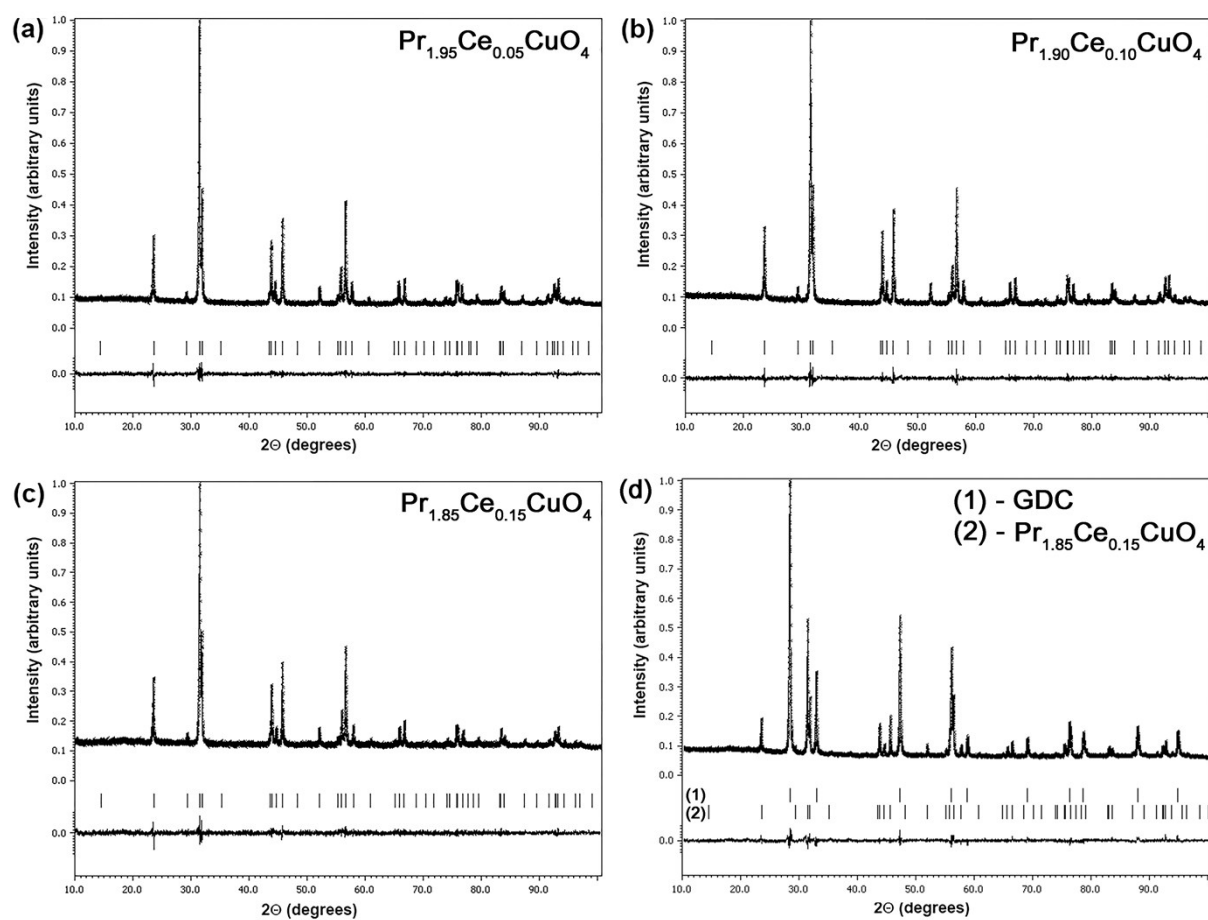

Fig. S11 XRPD patterns of the  $\text{Pr}_{2-x}\text{Ce}_x\text{CuO}_{4\pm\delta}$  ( $x = 0.05; 0.1; 0.15$ ) (a-c) and  $\text{Pr}_{1.85}\text{Ce}_{0.15}\text{CuO}_4/\text{GDC}$  mixture (d) annealed at 950 °C for 25 h in air.

Unit cell parameters of the  $\text{Pr}_{2-x}\text{Ce}_x\text{CuO}_4$  (space group  $I4/mmm$ )

| $\text{Pr}_{2-x}\text{Ce}_x\text{CuO}_4, x$ | Unit cell parameters |               |                 |
|---------------------------------------------|----------------------|---------------|-----------------|
|                                             | $a, \text{Å}$        | $c, \text{Å}$ | $V, \text{Å}^3$ |
| 0                                           | 3.9635(2)            | 12.2104(5)    | 191.8(1)        |
| 0.05                                        | 3.9634(1)            | 12.2207(4)    | 192.0(1)        |
| 0.10                                        | 3.9637(1)            | 12.1851(5)    | 191.4(1)        |
| 0.15                                        | 3.9644(1)            | 12.1581(6)    | 191.1(1)        |

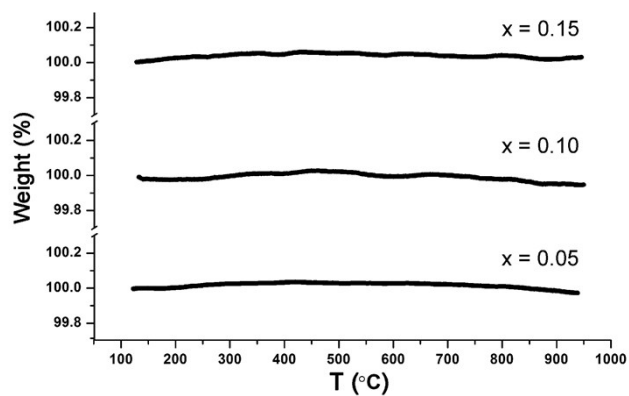

Fig. SI2 Temperature dependencies of a weight change of the  $\text{Pr}_{2-x}\text{Ce}_x\text{CuO}_{4\pm\delta}$  ( $x = 0.05; 0.1; 0.15$ ) upon heating in air.

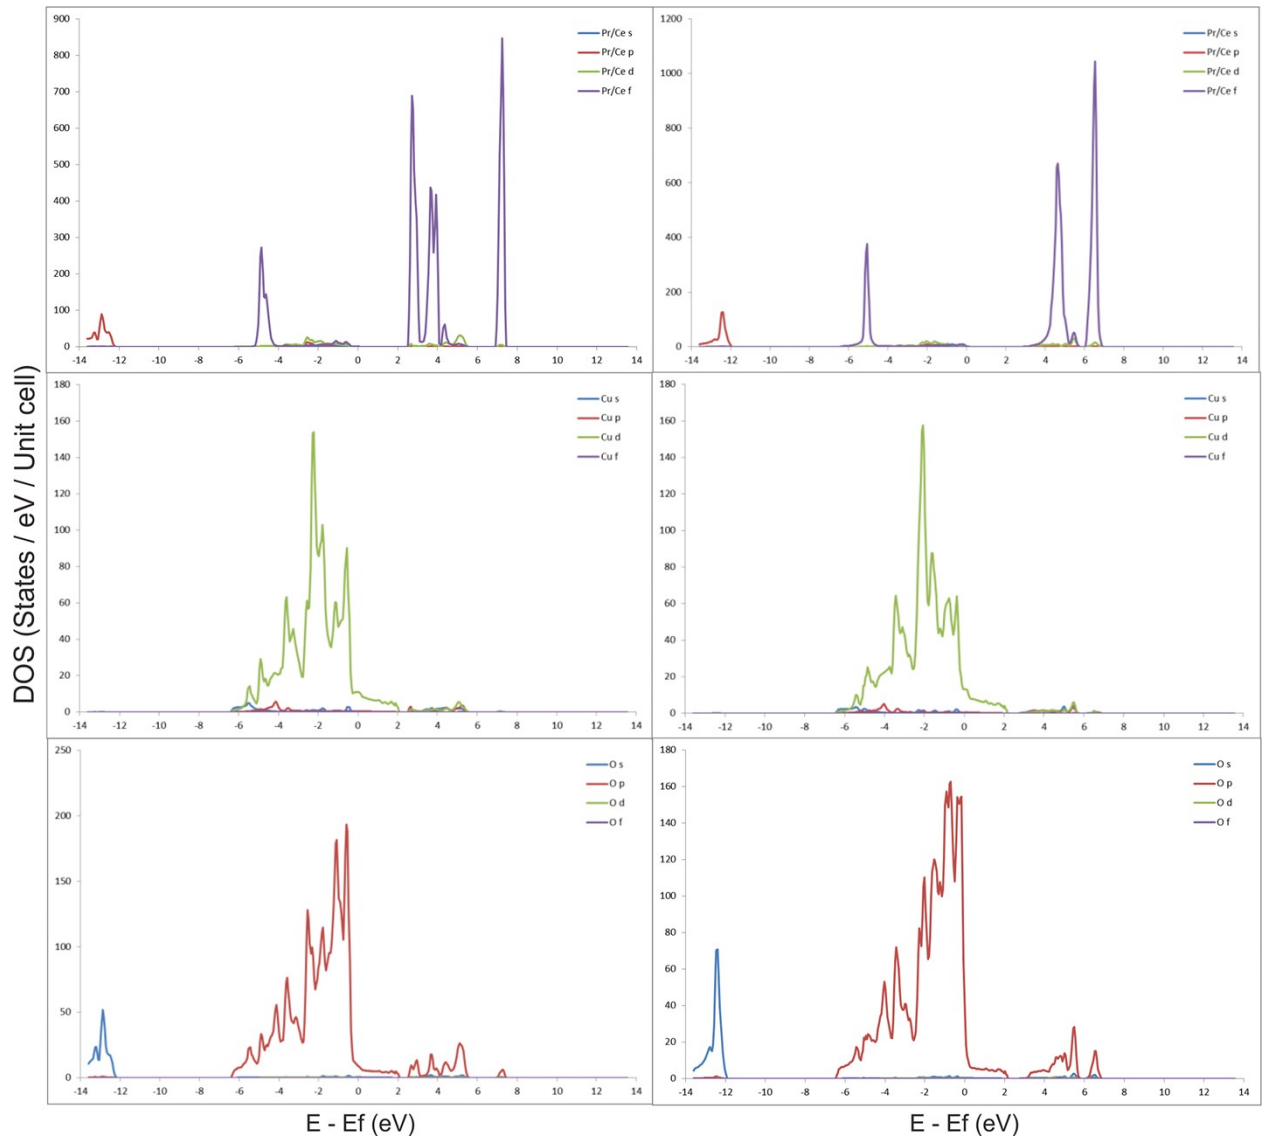

Fig.SI3 Partial DOS (*l*-resolved) for Pr/Ce, Cu, and O atoms in the 2.5%- (left column) and 10%- Ce (right column) doped  $\text{Pr}_2\text{CuO}_4$ . Fermi energy is at zero.
